# Supplementary material
Source: Royal Society of Chemistry journal article supplement (doi:10.1039/d6ta02663j)
Supplement: d6ta02663j1.pdf [file d6ta02663j1.pdf]

## Supplementary Information

### Interface-Engineered Z-Scheme CoIn<sub>2</sub>S<sub>4</sub>/MoSe<sub>2</sub> Heterostructure for Enhanced Charge Separation toward Bifunctional Photocatalytic H<sub>2</sub> Production and O<sub>2</sub> Reduction

Ravina Saini, Saloni Latiyan, Lakshya Kumar, Sasanka Deka\*

Department of Chemistry, University of Delhi, North Campus, Delhi-110007, India

\*Email: [sdeka@chemistry.du.ac.in](mailto:sdeka@chemistry.du.ac.in)

#### Materials and Methods

**Chemicals and reagents.** Cobalt (II) nitrate hexahydrate [Co(NO<sub>3</sub>)<sub>2</sub>.6H<sub>2</sub>O, 99.5%], indium (III) chloride [InCl<sub>3</sub>], sodium molybdate (IV) dihydrate [Na<sub>2</sub>MoO<sub>4</sub>.2H<sub>2</sub>O, 99.0%], thioacetamide (C<sub>2</sub>H<sub>5</sub>NS, 99.0%), hydrazine hydrate (N<sub>2</sub>H<sub>2</sub>.H<sub>2</sub>O, 99%), and selenium powder were purchased from Sigma Aldrich USA. Absolute ethanol (99%) and isopropanol (99%) were purchased from Fischer-India. Cerium (IV) sulfate anhydrous (97%), ferroin Solution, hydrogen peroxide (30%), sulphuric acid (98%), sodium sulphide (55-58%), sodium Sulphite anhydrous (96%) was purchased from Sigma-Aldrich. All chemicals are of analytical grade and used as received without any further purification.

#### Materials Characterization techniques:

1. **Powder X-ray diffraction (XRD):** Using powder X-ray diffraction (XRD) measurement, the crystal structure and phase purity of the as-synthesised CoIn<sub>2</sub>S<sub>4</sub>, MoSe<sub>2</sub>, and CoIn<sub>2</sub>S<sub>4</sub>/MoSe<sub>2</sub> were examined on a Rigaku ULTIMA IV X-Ray diffractometer by using Cu K $\alpha$  radiation ( $\lambda = 0.154056$  nm) source. Dried powder was deposited onto the sample holder for the XRD measurements.
2. **Atomic Force Microscopy (AFM):** AFM images were acquired on a Bruker Dimension Icon-XR scanning probe microscope. Morphology scans were taken in tapping mode under ambient conditions using RTESP-300 probes (Bruker; nominal spring constant  $\approx 42$  N·m<sup>-1</sup>, resonance  $\approx 300$  kHz). The instrument supports Peak Force/Peak Force-QNM, Fast Scan tapping, KPFM, and conductive AFM (CAFM) for simultaneous topographic, mechanical, and nanoelectrical mapping, and was used for

height, potential (KPFM), and current (CAFM/TUNA) measurements where indicated. Optical studies were done using a UV-vis Spectrophotometer (make and model Agilent Cary 5000, having wavelength range 175nm – 3300nm with a Double out-of-plane Littrow Monochromator, a light source: Tungsten-halogen and deuterium, and a detector: R 928 Photomultiplier).

3. **Field Emission Scanning Electron Microscopy (FESEM):** Morphological characterisation was carried out using field emission scanning electron microscopy (FESEM, Gemini SEM 500 analyser at 20 kV) using 10 mg solid powder sample.
4. **Transmission electron microscopy (TEM):** All TEM imaging, including the high-resolution transmission electron microscopy imaging (HR-TEM), was recorded using a JEOL JEM-F200 (200 kV) multi-purpose transmission electron microscope. The samples for TEM analysis were prepared by depositing two drops of a dilute solution of nanocrystals onto carbon-coated Cu grids. The Quad-Lens Condenser System was used for STEM-Elemental Mapping of the atomic weight percent of different elements.
5. **X-ray photoelectron spectroscopy (XPS):** Samples for chemical analysis by X-ray photoelectron spectroscopy (XPS) were deposited and dried onto a titanium substrate and then analyzed using an Axis Supra instrument with monochromatic Al K $\alpha$  X-ray (1486.7 eV).
6. **Brunauer-Emmett-Teller (BET):** Nitrogen adsorption-desorption analyses for surface area, pore size, and pore volume determination were carried out using the model Quantachrome AUTOSORB iQ equipment. The Brunauer-Emmett-Teller (BET) method was used for surface area Horvath-Kawazoe method was used for micropore analysis.
7. **UV-Vis Spectrophotometer:** Ultraviolet-visible spectra (UV-vis) of solid materials were recorded on an Agilent Cary 5000 spectrophotometer using a Wavelength range of 200 nm – 800 nm. Monochromator: Double out-of-plane Littrow Monochromator, Light source: Tungsten-halogen and deuterium, Detector: For UV-VIS: R 928 Photomultiplier were used.
8. **Photoluminescence (PL):** Photoluminescence (PL) measurements for the individual samples were carried out using an Agilent Cary 5000 spectrophotometer. A very dilute solution was prepared by dispersing 1–2 mg of the sample in 4 mL of distilled water to ensure optimal measurement conditions.
9. **Time Resolved Photoluminescence (TRPL):** This was performed on Up/Down conversion PL using Horiba Canada, Model: FL 1039A/40A. Time Decay in the

microseconds range was measured using a Xenon lamp, Time Correlated Single Photon Counting (TCSPC) (Model: NL-C2 Pulsed Diode Controller, NANO LED, make: Horiba Scientific), which can be done using a Nano LED Laser having a wavelength of 375-315nm for a solid powder sample.

10. **Electron Spin/Paramagnetic Resonance (ESR/EPR) Spectrometer:** This characterization were done using JEOL model: JES-X320, Sensitivity:  $5 \times 10^9$  spins/0.1 mT, using powder sample type, having Standard Frequency: X-band: 8.75 – 9.65 GHz, Q-band: 34 – 36 GHz, Microwave oscillation source: Gunn diode oscillator, Frequency resolution: 10 kHz, Electromagnet: Magnetic Field Range: 1300 mT (1.3 T), Resolution: 2.35  $\mu$ T, Magnetic Field Stability: 0.5 – 1.0  $\mu$ T, Cavity Resonator: Resonance Mode: TE011 cylindrical, Resonator resonant frequency: 9450 MHz, Spectrometer: Frequency: 100 kHz, 50 kHz, 25 kHz, Magnetic field sweep width:  $\pm$  500 mT, Temperature dependent, Low Temperature Range: Upto -160 °C (liquid nitrogen).
11. **Ultraviolet Photoelectron Spectroscopy (UPS):** For individual  $\text{CoIn}_2\text{S}_4$  and  $\text{MoSe}_2$  samples, UPS measurements were performed using a THERMO SCIENTIFIC ESCALAB QXi instrument. Helium gas was employed as the excitation source. For sample preparation, a 1 cm  $\times$  1 cm glass slide was used as the substrate. A catalyst slurry was prepared by dispersing 20 mg of the catalyst in 2 mL of isopropanol and stirring overnight to ensure uniform mixing. The resulting slurry was then coated onto the glass slide using a brush and allowed to dry before measurement.
12. **Mott-Schottky plot (M-S plot) and Electrochemical impedance spectroscopy (EIS) Measurements:** A Metrohm Autolab 204 potentiostat, managed by NOVA software (Metrohm, Netherlands), was used to perform both measurements at room temperature. The conventional three-electrode setup consisted of an Ag/AgCl reference electrode (saturated with KCl), a platinum wire counter electrode, and a glass slide coated with FTO as the working electrode. The working electrodes were prepared by coating them with the samples. For this, 100 mg of the catalyst sample was dissolved in 0.975 mL of acetone, and 25  $\mu$ L of PVDF binder was added to create the working electrode films. After 30 minutes of sonication, this mixture was uniformly dispersed. On the surface of glass slides coated with FTO, around 100  $\mu$ L of the resultant ink was applied (1  $\text{cm}^2$ ). Following deposition, the films were dried for one hour at 60°C and then annealed for two hours at 200°C to improve their adherence to the substrate. After that, the electrodes were submerged in an aqueous solution of 0.5 M  $\text{Na}_2\text{SO}_4$ , which was used as the inert

electrolyte for the EIS as well as M-S plot measurements. The Mott-Schottky (M-S) plot can be obtained by the following formula:

$$\frac{1}{C_s^2} = \frac{2}{\epsilon_0 \epsilon_r q N_A} \left( V_{\text{applied}} - V_{\text{fb}} - \frac{k_B T}{q} \right) \quad (2)$$

in which  $C_s$  is specific capacitance of our material,  $\epsilon_0$  is the permittivity of vacuum,  $\epsilon_r$  is relative permittivity (value used 4.7 related to sulphur and 5.17 related to selenium),  $q$  is the electron charge,  $N_A$  is the charge carrier density,  $E_{\text{fb}}$  is the flat band potential,  $k_B$  is the Boltzmann constant,  $T$  is the temperature,  $V_{\text{applied}}$  is the electrode potential, and  $V_{\text{fb}}$  represents the flat band potentials of the material

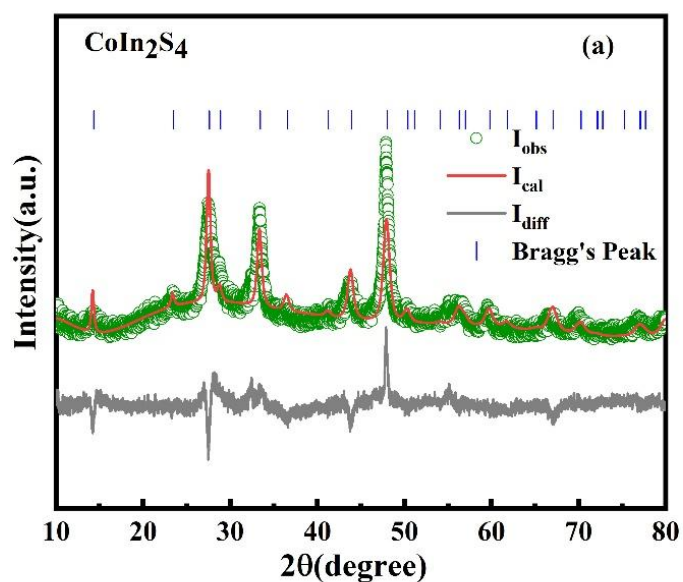

**Fig. S1.** Rietveld refinement for  $\text{CoIn}_2\text{S}_4$ .

**Table S1.** Refinement parameters from Fig. S1.

| Catalysts                 | $R_{\text{wp}}$ (%) | $R_{\text{exp}}$ (%) | $\chi^2$ |
|---------------------------|---------------------|----------------------|----------|
| $\text{CoIn}_2\text{S}_4$ | 7.38                | 5.36                 | 1.56     |

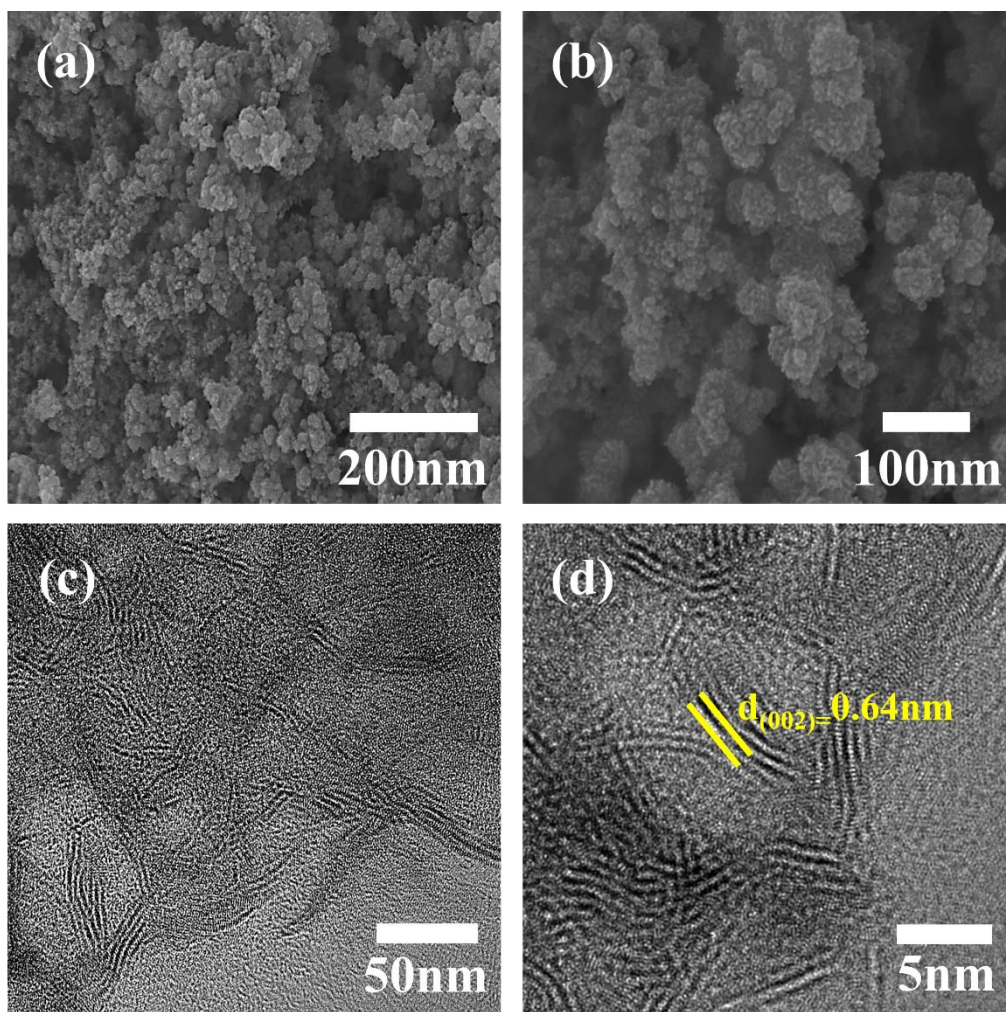

**Fig. S2.** (a, b) FESEM images of the MoSe<sub>2</sub> sample exhibiting an agglomerated nanourchin structure. (c, d) TEM and HR-TEM images of MoSe<sub>2</sub> showing a nanosheet.

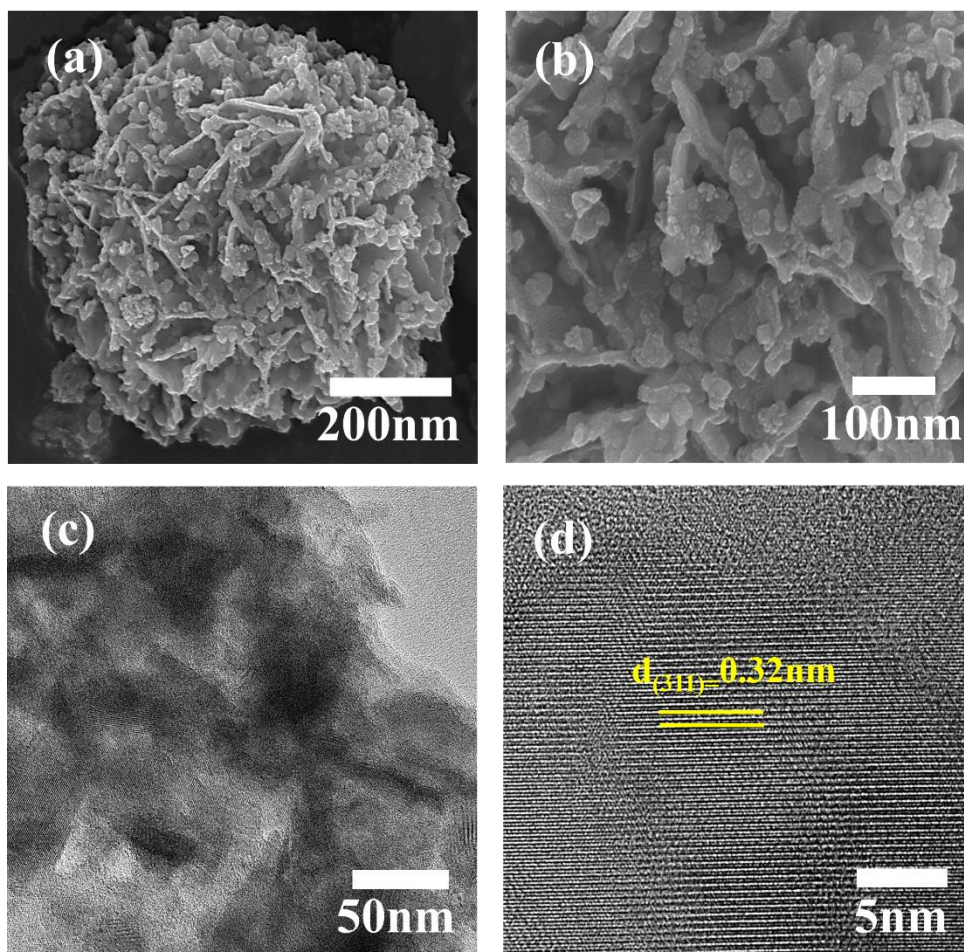

**Fig. S3.** (a, b) FESEM images of the  $\text{CoIn}_2\text{S}_4$  sample exhibiting an agglomerated nanosheet structure. (c, d) TEM and HR-TEM images of  $\text{CoIn}_2\text{S}_4$  showing nanosheet.

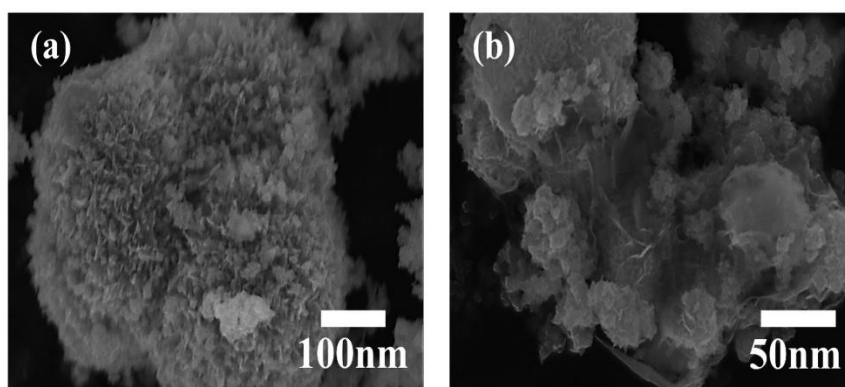

**Fig. S4.** (a, b) FESEM images of  $\text{CoIn}_2\text{S}_4/\text{MoSe}_2$  sample exhibiting nanosheets that form a highly open three-dimensional hierarchical

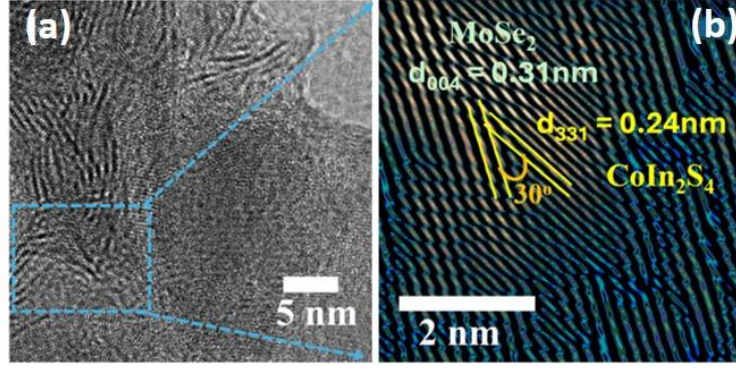

**Fig. S5.** (c) HRTEM image of CoIn<sub>2</sub>S<sub>4</sub>/MoSe<sub>2</sub> heterostructure and its (d) inverse FFT image showing growth of CoIn<sub>2</sub>S<sub>4</sub> on MoSe<sub>2</sub>.

#### Determination of the lattice mismatch:

The mismatch degree between the (400) plane of CoIn<sub>2</sub>S<sub>4</sub> and the (002) plane of MoSe<sub>2</sub> was determined based on the following equation:

$$f = \frac{\alpha_s - \alpha_g}{\alpha_s} \times 100\% = \frac{d_s - d_g}{d_s} \times 100\%$$

The term,  $\alpha_s$  and  $\alpha_g$  represent the lattice constants, and  $d_s$  and  $d_g$  represent the lattice spacing of the two materials, respectively.

According to XRD and HRTEM results for **Fig. 1g**, the lattice spacing relationship between the (400) plane of CoIn<sub>2</sub>S<sub>4</sub> and the (002) plane of MoSe<sub>2</sub> in CIS/MS is with an angle 72°. In theory, the  $d_s$  and  $d_g$  are 0.64 and 0.26 nm, respectively. Therefore, the  $d_g$  in there should be calculated to be 0.84 following the equation of  $d_g = \frac{0.26}{\cos 72^\circ}$ . Finally, the mismatch degree can be determined to be 31% based on the equation of  $f = \frac{0.64 - 0.84}{0.64}$ . The above calculation process can also be found in earlier literature.<sup>[1,2]</sup>

For **Fig. S5**, the (331) plane of CoIn<sub>2</sub>S<sub>4</sub> and the (004) plane of MoSe<sub>2</sub> in CIS/MS are at an angle of 30°, with lattice spacing equal to 0.24 and 0.31 nm, respectively.

$$\text{Therefore, } d_g = \frac{0.24}{\cos 41^\circ} = 0.27$$

$$\text{Finally, } f = \frac{0.31 - 0.27}{0.31} \times 100\% = 12.9\%$$

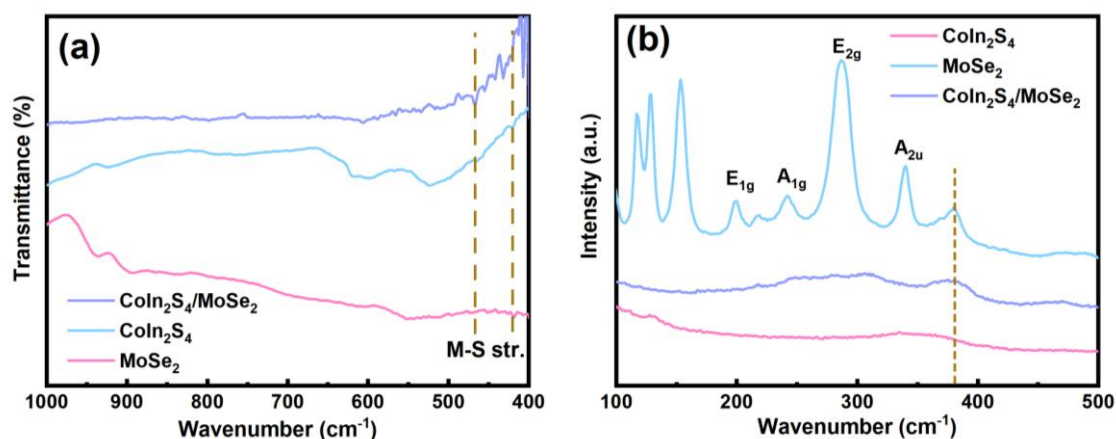

Fig. S6. (a) FT-IR, (b) RAMAN Spectra for samples as indicated.

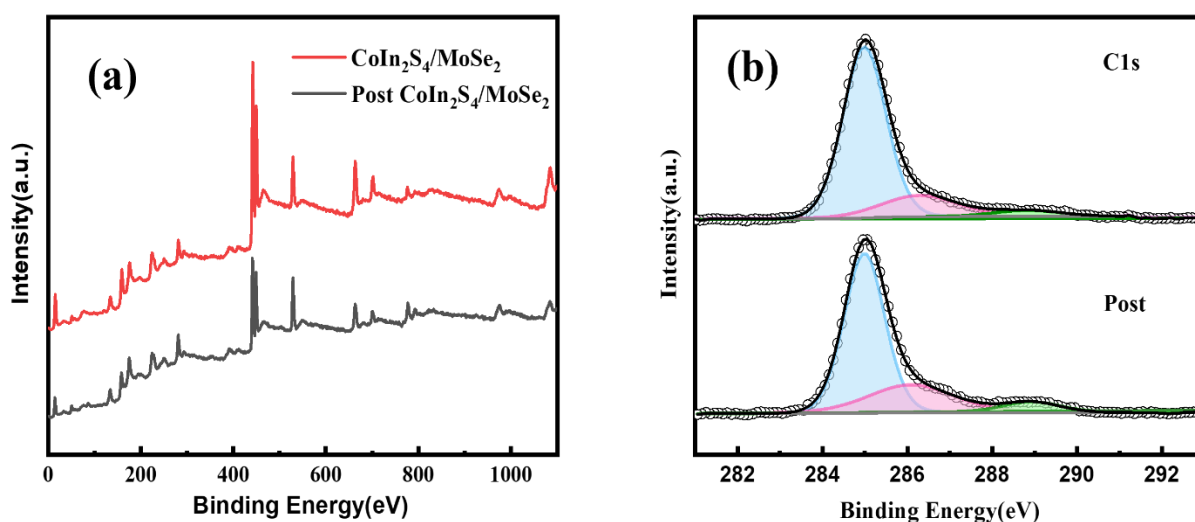

Fig. S7. (a) XPS Survey spectra of as-prepared CoIn<sub>2</sub>S<sub>4</sub>/MoSe<sub>2</sub> and CoIn<sub>2</sub>S<sub>4</sub>/MoSe<sub>2</sub> after 15h photocatalysis, High-resolution XPS: (b) C 1s.

### Calculation of average lifetime:

The average lifetime ( $\tau_a$ ) can be determined using the following equation:

$$\tau_a = \frac{A_1\tau_1^2 + A_2\tau_2^2 + A_3\tau_3^2}{A_1\tau_1 + A_2\tau_2 + A_3\tau_3} \quad (S1)$$

Where  $A_1$ ,  $A_2$ ,  $A_3$  and  $\tau_1$ ,  $\tau_2$ ,  $\tau_3$  are the amplitude and lifetime components, respectively.

**Table S2.** The decay lifetimes and the average lifetime of photoexcited charge carriers in  $\text{CoIn}_2\text{S}_4$ ,  $\text{MoSe}_2$  and  $\text{CoIn}_2\text{S}_4/\text{MoSe}_2$  photocatalysts are listed below:

| Sample                                  | Amplitude components |       |        | Lifetime components (ns) |          |          | Average life time ( $\tau_a$ ) ns |
|-----------------------------------------|----------------------|-------|--------|--------------------------|----------|----------|-----------------------------------|
|                                         | $A_1$                | $A_2$ | $A_3$  | $\tau_1$                 | $\tau_2$ | $\tau_3$ |                                   |
| $\text{CoIn}_2\text{S}_4$               | 337.0                | 308.3 | 99.3   | 0.50                     | 0.50     | 2.56     | 1.40                              |
| $\text{MoSe}_2$                         | 48.1                 | 343.9 | -326.4 | 2.98                     | 0.22     | 0.21     | 2.85                              |
| $\text{CoIn}_2\text{S}_4/\text{MoSe}_2$ | 336.8                | 273.5 | 182.3  | 0.44                     | 0.43     | 10.41    | 9.18                              |

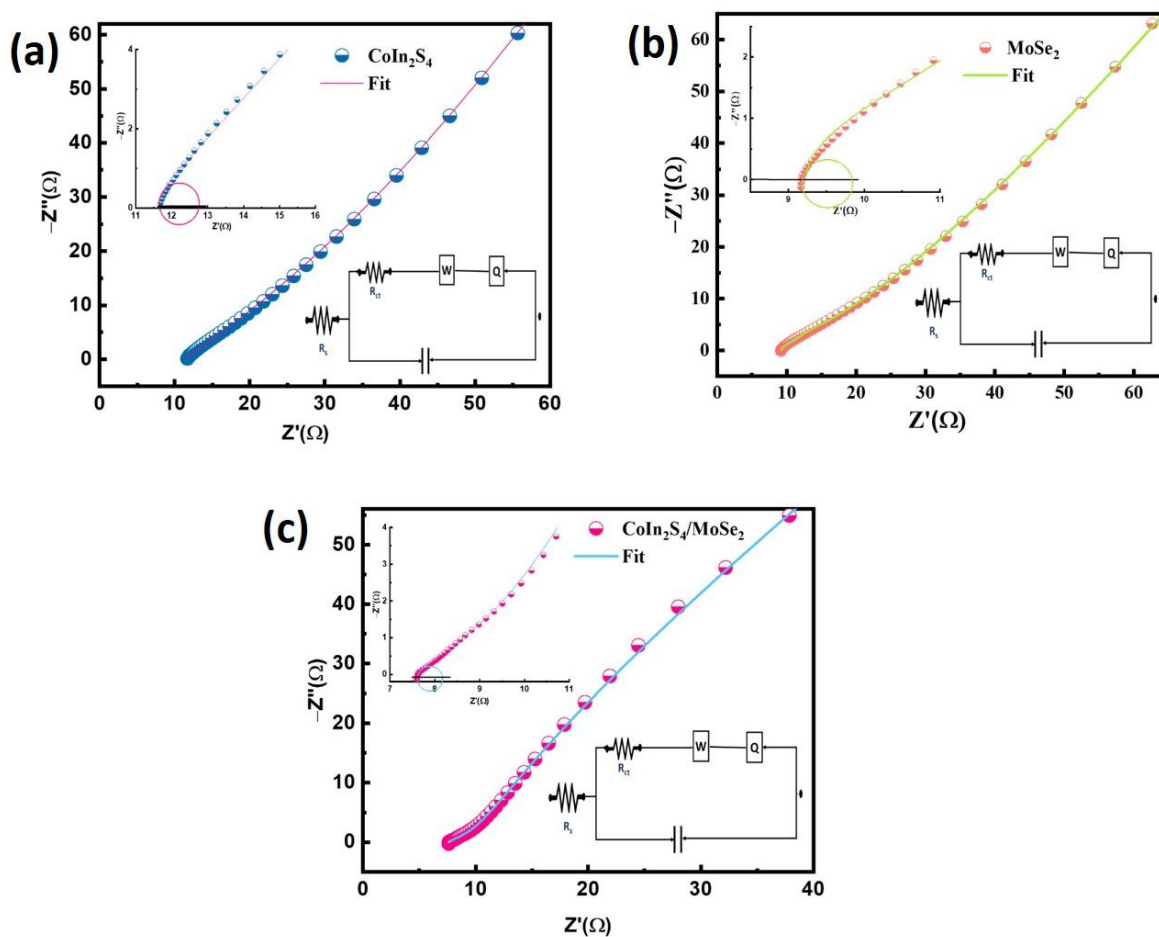

**Fig. S8.** Nyquist plots along with circuit diagram for (a)  $\text{CoIn}_2\text{S}_4$ , (b)  $\text{MoSe}_2$ , and (c)  $\text{CoIn}_2\text{S}_4/\text{MoSe}_2$ .

**Table S3.** Calculated EIS parameters from Fig. S7.

| S. No. | Sample                                                  | $R_s$ ( $\Omega$ ) | $R_{ct}$ ( $\Omega$ ) | $R_t$ ( $\Omega$ ) | $C$ ( $\mu F$ ) | $W$ ( $m \Omega^{-1} s^{1/2}$ ) | $CPE Y_0$ (F)        |
|--------|---------------------------------------------------------|--------------------|-----------------------|--------------------|-----------------|---------------------------------|----------------------|
| 1.     | CoIn <sub>2</sub> S <sub>4</sub>                        | 11.6               | 12.8                  | 24.4               | 28.4            | 1.87                            | $1.1 \times 10^{-4}$ |
| 2.     | MoSe <sub>2</sub>                                       | 9.1                | 9.8                   | 18.9               | 26.3            | 7.94                            | $1.3 \times 10^{-4}$ |
| 3.     | CoIn <sub>2</sub> S <sub>4</sub> /<br>MoSe <sub>2</sub> | 7.5                | 8.1                   | 15.6               | 17.2            | 21.4                            | $4.3 \times 10^{-3}$ |

**Table S4.** Surface area, pore volume, and pore size from BET measurements.

| Sample                                              | $S_{BET}$ ( $m^2 g^{-1}$ ) | Pore Volume ( $cm^3 g^{-1}$ ) | Pore Size (nm) |
|-----------------------------------------------------|----------------------------|-------------------------------|----------------|
| CoIn <sub>2</sub> S <sub>4</sub> /MoSe <sub>2</sub> | 65.768                     | 0.101                         | 1.91           |
| CoIn <sub>2</sub> S <sub>4</sub>                    | 43.723                     | 0.061                         | 1.91           |
| MoSe <sub>2</sub>                                   | 41.742                     | 0.075                         | 1.90           |

**Table S5.** Types of different sacrificial reagents and the corresponding measured pH values.

| S. No. | Sacrificial reagents                                    | Measured pH |
|--------|---------------------------------------------------------|-------------|
| 1      | Ascorbic Acid                                           | 2.18        |
| 2      | Na <sub>2</sub> S/Na <sub>2</sub> SO <sub>3</sub> (1:1) | 12.93       |
| 3      | TEOH (10%)                                              | 12.0        |
| 4      | Methanol (10%)                                          | 7.50        |
| 5      | Lactic acid (10%)                                       | 1.18        |

## CALCULATIONS:

**Determination of Donor Concentration ( $N_A$ ) of  $\text{CoIn}_2\text{S}_4$  and  $\text{MoSe}_2$  sample using slope from Mott-Schottky Plot.**

$$\text{Slop} = \frac{2}{\epsilon_0 \epsilon_r q N_A}$$

Here,

$\epsilon_0$  = permittivity of vacuum

$\epsilon_r$  = relative permittivity

q = electron charge

$N_A$  = charge carrier density

$k_B$  = Boltzmann constant and T = Temperature. This term  $k_B T$  is negligible (0.0244) in comparison to others.

### For $\text{CoIn}_2\text{S}_4$ :

$$\begin{aligned} N_A &= 2/8.85 \times 10^{-10} \times 4.7 \times 1.602 \times 10^{-19} \times 2.50 \times 10^8 \\ &= 1.2 \times 10^{19} \text{ cm}^{-3} \end{aligned}$$

### For $\text{MoSe}_2$ :

$$\begin{aligned} N_A &= 2/8.85 \times 10^{-10} \times 5.17 \times 1.602 \times 10^{-19} \times 0.49 \times 10^8 \\ &= 5.5 \times 10^{19} \text{ cm}^{-3} \end{aligned}$$

## Photocatalytic Reaction

### **1. Rate of $\text{H}_2$ production**

For  $\text{CoIn}_2\text{S}_4/\text{MoSe}_2$ :

$$0.0003024 \text{ mole h}^{-1} = 0.3024 \text{ mmol h}^{-1} = 302.4 \text{ } \mu\text{mol h}^{-1} = 302.4/0.01 \text{ } \mu\text{mol h}^{-1} \text{ g}^{-1} = 30,240 \text{ } \mu\text{mol h}^{-1} \text{ g}^{-1}$$

### **2. Number of $\text{H}_2$ molecules produced from $\text{CoIn}_2\text{S}_4$ :**

The Volume of gas liberated in reaction in 1h = 3.0 ml = 0.003 L

Form std. gas equation  $PV = nRT$

$$n = 0.003 \text{ L} \times 1 \text{ atm} / 0.082 \text{ L.atm mol}^{-1} \text{ K}^{-1} \times 298 \text{ K}$$

The corresponding amount of hydrogen in moles = 0.0001226 moles h<sup>-1</sup>

1 mole gas =  $6.023 \times 10^{23}$  molecules

$$0.0001226 \text{ moles will have} = 6.023 \times 10^{23} \times 0.0001226 = 7.39 \times 10^{19}$$

$$\text{H}_2 \text{ molecule (per s)} = (6.023 \times 10^{23} \times 0.0001226) / (60 \text{ min} \times 60 \text{ s}) = 2.05 \times 10^{16}$$

### 3. Number of H<sub>2</sub> molecule produced from MoSe<sub>2</sub>:

The Volume of gas liberated in reaction in 1h = 4.9 ml = 0.0049 L

Form std. gas equation  $PV = nRT$

$$n = 0.0049 \text{ L} \times 1 \text{ atm} / 0.082 \text{ L.atm mol}^{-1} \text{ K}^{-1} \times 298 \text{ K}$$

The corresponding amount of hydrogen in moles = 0.0002005 moles h<sup>-1</sup>

1 mole gas =  $6.023 \times 10^{23}$  molecules

$$0.0002005 \text{ moles will have} = 6.023 \times 10^{23} \times 0.0002005$$

$$\text{H}_2 \text{ molecule (per s)} = (6.023 \times 10^{23} \times 0.0002005) / (60 \text{ min} \times 60 \text{ s}) = 3.35 \times 10^{16}$$

### 4. Number of H<sub>2</sub> molecule produced from CoIn<sub>2</sub>S<sub>4</sub>/MoSe<sub>2</sub>:

The Volume of gas liberated in reaction in 1h = 7.4 ml = 0.0074 L

Form std. gas equation  $PV = nRT$

$$n = 0.0074 \text{ L} \times 1 \text{ atm} / 0.082 \text{ L.atm mol}^{-1} \text{ K}^{-1} \times 298 \text{ K}$$

The corresponding amount of hydrogen in moles = 0.0003028 moles h<sup>-1</sup>

1 mole gas =  $6.023 \times 10^{23}$  molecules

$$0.0003028 \text{ moles will have} = 6.023 \times 10^{23} \times 0.0003028$$

$$\text{H}_2 \text{ molecule (per s)} = (6.023 \times 10^{23} \times 0.0003028) / (60 \text{ min} \times 60 \text{ s}) = 5.06 \times 10^{16}$$

**Table S6.** Comparative assessment of robust photocatalysts and their H<sub>2</sub> Evolution characteristics.

| Sr. No. | Catalysts                                                                                        | Light Source              | Sacrificial reagents                                            | H <sub>2</sub> Evolved ( $\mu\text{mol g}^{-1} \text{h}^{-1}$ ) | Catalyst mass (in mg) | Ref.             |
|---------|--------------------------------------------------------------------------------------------------|---------------------------|-----------------------------------------------------------------|-----------------------------------------------------------------|-----------------------|------------------|
| 1.      | <b>CoIn<sub>2</sub>S<sub>4</sub>/MoSe<sub>2</sub></b>                                            | <b>300W Xenon Lamp</b>    | <b>0.35M/0.25M Na<sub>2</sub>S/Na<sub>2</sub>SO<sub>3</sub></b> | <b>30240</b>                                                    | <b>10</b>             | <b>This Work</b> |
| 2.      | Zn <sub>0.5</sub> Cd <sub>0.5</sub> S@ZnIn <sub>2</sub> S <sub>4</sub> /MoS <sub>2</sub>         | 300 W-Xe arc lamp         | TEOA                                                            | 8500                                                            | 10                    | 3                |
| 3.      | covalent organic polymer COP-ZnIn <sub>2</sub> S <sub>4</sub> /Pt                                | 300 W Xenon lamp          | Na <sub>2</sub> S/Na <sub>2</sub> SO <sub>3</sub>               | 5040                                                            | 10                    | 4                |
| 4.      | CdS/MoSe <sub>2</sub>                                                                            | 300 W Xe lamp             | Na <sub>2</sub> SO <sub>4</sub>                                 | 25800                                                           | 10                    | 5                |
| 5.      | CdSe/NaNbO <sub>3</sub>                                                                          | 300 W Xe lamp             | Na <sub>2</sub> S/Na <sub>2</sub> SO <sub>3</sub>               | 2510                                                            | 20                    | 6                |
| 6.      | BiVO <sub>4</sub> /ZnIn <sub>2</sub> S <sub>4</sub>                                              | 300 W Xe lamp             | TEOA                                                            | 2243                                                            | 50                    | 7                |
| 7.      | NiTiO <sub>3</sub> /TiO <sub>2</sub>                                                             | UV LED                    | Ethanol                                                         | 11500                                                           | 2.0                   | 8                |
| 8.      | ZnIn <sub>2</sub> S <sub>4</sub> /MoSe <sub>2</sub>                                              | 300W Xenon Lamp           | lactic acid                                                     | 1748                                                            | 5.0                   | 9                |
| 9.      | Co <sub>3</sub> O <sub>4</sub> quantum dots /2D graphdiyne (g-C <sub>n</sub> H <sub>2n-2</sub> ) | 5 W LED white-light       | TEOA                                                            | 1500.85                                                         | 6.0                   | 10               |
| 10.     | LaCoO <sub>3</sub> /g-C <sub>3</sub> N <sub>4</sub>                                              | 300 W xenon lamp          | methanol                                                        | 1046.15                                                         | 30                    | 11               |
| 11.     | ZnIn <sub>2</sub> S <sub>4</sub> @In(OH) <sub>3</sub> @CdS                                       | 300 W Xenon lamp          | lactic acid                                                     | 1384                                                            | 30                    | 12               |
| 12.     | BP/BiVO <sub>4</sub>                                                                             | 300 W xenon lamp          | No                                                              | 160                                                             | 5.0                   | 13               |
| 13.     | CoIn <sub>2</sub> S <sub>4</sub> /g-C <sub>3</sub> N <sub>4</sub>                                | 300 W, $\lambda > 420$ nm | TEOA                                                            | 62.701                                                          | 50                    | 14               |
| 14.     | TiO <sub>2</sub> /ZnTCuMT-X MOF                                                                  | 300 W xenon lamp          | TEOA                                                            | 3035.5                                                          | 10                    | 15               |
| 15.     | ZnIn <sub>2</sub> S <sub>4</sub> -Au-TiO <sub>2</sub>                                            | 300 W Xe lamp             | No                                                              | 186.3                                                           | 50                    | 16               |

### 5. Apparent quantum efficiency (AQE %) for H<sub>2</sub> production

$$AQE = \frac{2 \times nH_2}{\text{Number of incident photons}} = \frac{2 \cdot nH_2}{\frac{IA\lambda}{hc}} \times 100(\%)$$

Where, nH<sub>2</sub> is the number of H<sub>2</sub> molecules produced per second, I is the incident solar irradiance (W/cm<sup>2</sup>) over the irradiated area A (cm<sup>2</sup>), λ is the wavelength of the present study (nm), h Planck's constant and c is the speed of light.

$$nH_2 = 5.06 \times 10^{16} \text{ per second}$$

$$I = 2500 \text{ lux} = 0.00275 \text{ W/cm}^2$$

$$A = 50.2 \text{ cm}^2$$

$$AQE = \frac{2 * 5.06 * 10^{16}}{(0.00275 * 50.2 * \lambda * 10^{-9}) / (6.626 * 10^{-34} * 3 * 10^8)} \left( \frac{s^{-1}}{\frac{W}{cm^2 \cdot cm^2 \cdot m}} \right) * 100\%$$

**Table S7.** Calculated AQE at the specified wavelength.

| S. No. | Wavelength (nm) (λ value in the above equation) | AQE (%) |
|--------|-------------------------------------------------|---------|
| 1      | 420                                             | 34.7    |
| 2      | 430                                             | 33.8    |
| 3      | 440                                             | 33.1    |
| 4      | 450                                             | 32.3    |
| 5      | 460                                             | 31.6    |
| 6      | 470                                             | 31.0    |
| 7      | 480                                             | 30.3    |
| 8      | 490                                             | 29.7    |
| 9      | 500                                             | 29.1    |
| 10     | 510                                             | 28.5    |
| 11     | 520                                             | 28.0    |
| 12     | 530                                             | 27.5    |

|    |     |      |
|----|-----|------|
| 13 | 540 | 26.9 |
| 14 | 550 | 26.5 |
| 15 | 560 | 26.0 |
| 16 | 570 | 25.5 |
| 17 | 580 | 25.1 |
| 18 | 590 | 24.7 |
| 19 | 600 | 24.2 |

Average AQE = 27.7 %

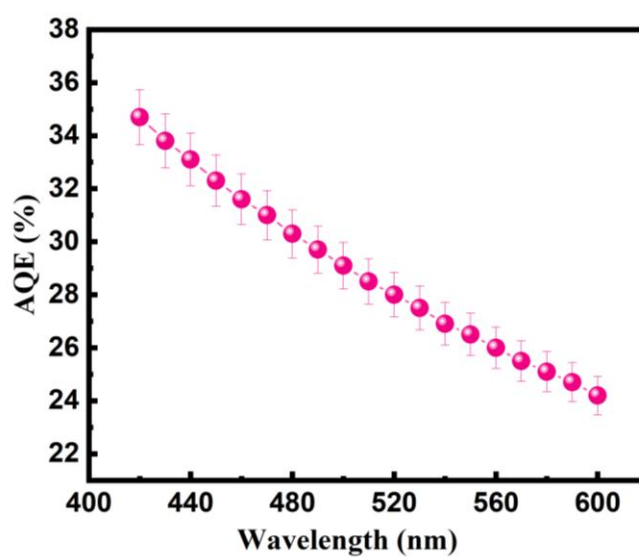

**Fig. S9.** Photocatalytic H<sub>2</sub> production: Apparent quantum efficiency of CoIn<sub>2</sub>S<sub>4</sub>/MoSe<sub>2</sub> (Photocatalyst: 10 mg; Photolyte: 30 mL of (1:1) Na<sub>2</sub>S/Na<sub>2</sub>SO<sub>3</sub> solution; light source: 300 W Xenon light).

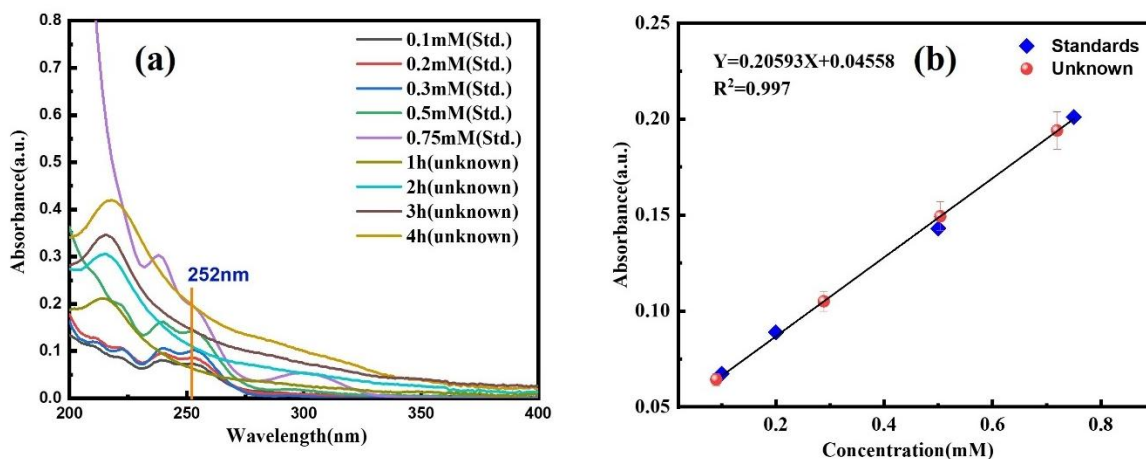

**Fig. S10.** (a) UV–Vis absorption intensity for various standard concentrations of  $\text{H}_2\text{O}_2$  and unknown concentrations of  $\text{H}_2\text{O}_2$  taken from the reactor after 1h interval using the titration method. (b) The linear calibration equation for the standard  $\text{H}_2\text{O}_2$  concentrations.

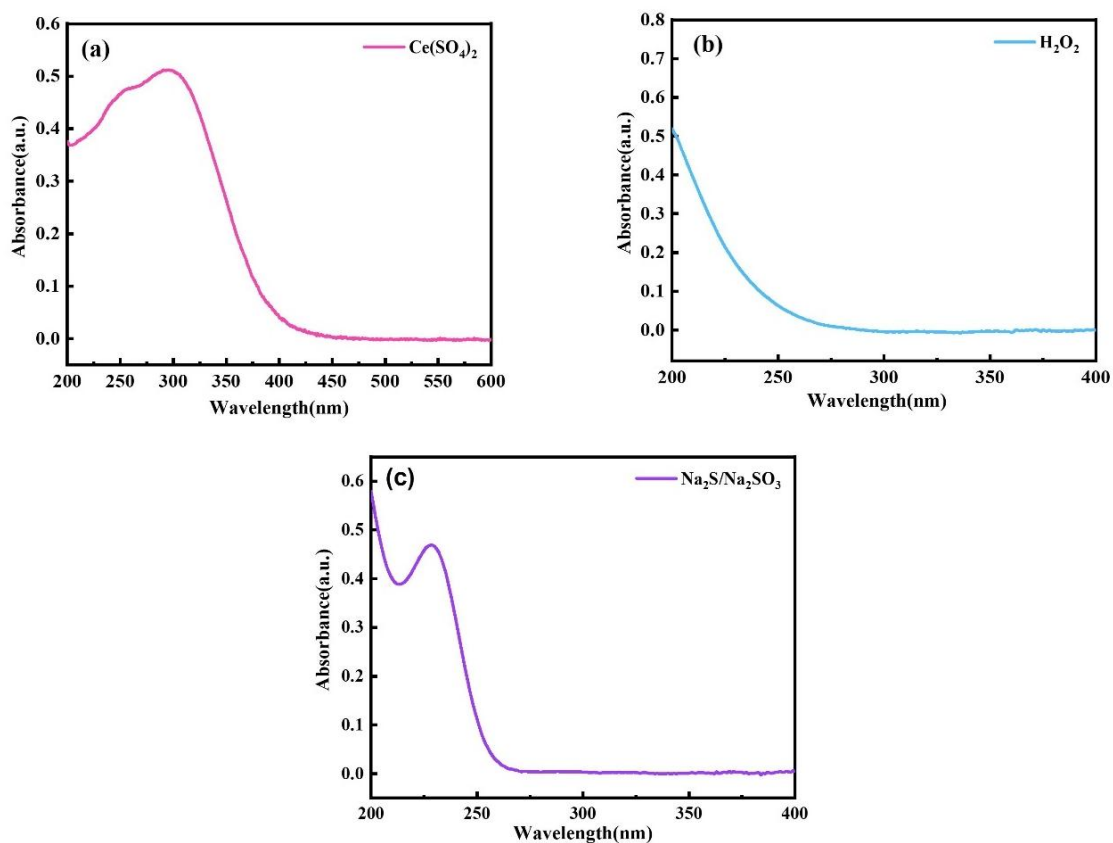

**Fig. S11.** UV–Vis absorption spectrum of (a) Cerium sulphate, (b)  $\text{H}_2\text{O}_2$  and (c)  $\text{Na}_2\text{S}/\text{Na}_2\text{SO}_3$ .

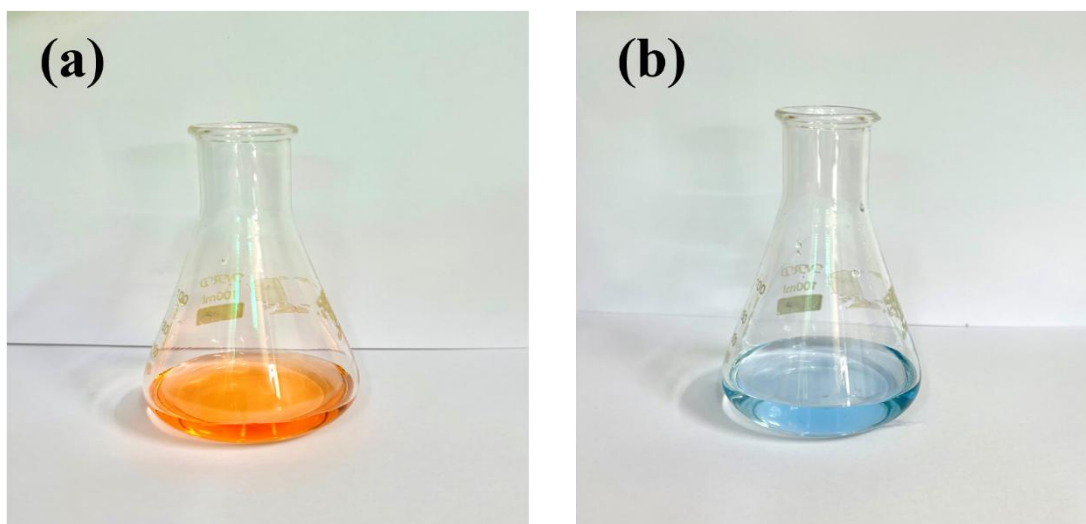

**Fig. S12.** Photographs of titration results in a color change from orange-red to blue-green. (a) before titration and (b) after titration.

**Table S8.** Comparison of reference photocatalysts and their efficiency in hydrogen peroxide ( $\text{H}_2\text{O}_2$ ) production.

| Sr. No. | Catalysts                                        | Reaction condition | Light Source                                                                           | $\text{H}_2\text{O}_2$ Production rate ( $\text{mmol g}^{-1} \text{h}^{-1}$ ) | AQE(%) | Ref.      |
|---------|--------------------------------------------------|--------------------|----------------------------------------------------------------------------------------|-------------------------------------------------------------------------------|--------|-----------|
| 1.      | $\text{CoIn}_2\text{S}_4/\text{MoSe}_2$          | 300W Xe Lamp       | Water +<br>$0.35\text{M}/0.25\text{M}$<br>$\text{Na}_2\text{S}/\text{Na}_2\text{SO}_3$ | 19.600                                                                        | 11.2   | This work |
| 2.      | $\text{ZnO}/\text{WO}_3$                         | 300W Xe lamp       | Water                                                                                  | 6.788                                                                         | 12.5   | 17        |
| 3.      | $\text{ZnO}/\text{g-C}_3\text{N}_4$              | 300W Xe lamp       | Water                                                                                  | 1.544                                                                         | ...    | 18        |
| 4.      | $\text{KCN}/\text{ZnO}$                          | 300W Xe lamp       | Water +<br>Ethanol                                                                     | 4.72                                                                          | ...    | 19        |
| 5.      | $\text{CoIn}_2\text{S}_4/\text{Ag}_3\text{PO}_4$ | 300W Xe lamp       | Water                                                                                  | 1.534                                                                         | 2.67   | 20        |
| 6.      | $\text{Bi}_2\text{O}_3/\text{ZnIn}_2\text{S}_4$  | 300W Xe lamp       | Water                                                                                  | 0.600                                                                         | ...    | 21        |

**Apparent quantum efficiency (AQE %) for H<sub>2</sub>O<sub>2</sub> production:**

$$AQE = \frac{2 \times nH_2O_2}{\text{Number of incident photons}} = \frac{2 \cdot nH_2O_2}{\frac{IA\lambda}{hc}} \times 100(\%)$$

$$AQE = \frac{2 * 1.63 * 10^{16}}{(0.00275 * 50.2 * \lambda * 10^{-9}) / (6.626 * 10^{-34} * 3 * 10^8)} \left( \frac{s^{-1}}{\frac{W}{cm^2 \cdot cm^2 \cdot m}} \right) * 100\%$$

*j. s. m. s<sup>-1</sup>*

**Table S9.** Calculated AQE at the specified wavelength.

| S. No. | Wavelength (nm) ( $\lambda$ value in the above equation) | AQE (%) |
|--------|----------------------------------------------------------|---------|
| 1      | 420                                                      | 11.2    |
| 2      | 430                                                      | 10.9    |
| 3      | 440                                                      | 10.7    |
| 4      | 450                                                      | 10.4    |
| 5      | 460                                                      | 10.2    |
| 6      | 470                                                      | 10      |
| 7      | 480                                                      | 9.8     |
| 8      | 490                                                      | 9.6     |
| 9      | 500                                                      | 9.4     |
| 10     | 510                                                      | 9.2     |
| 11     | 520                                                      | 9.0     |
| 12     | 530                                                      | 8.9     |
| 13     | 540                                                      | 8.7     |
| 14     | 550                                                      | 8.5     |
| 15     | 560                                                      | 8.4     |
| 16     | 570                                                      | 8.2     |
| 17     | 580                                                      | 8.1     |
| 18     | 590                                                      | 7.9     |
| 19     | 600                                                      | 7.8     |

**Average AQE = 9.31 %**

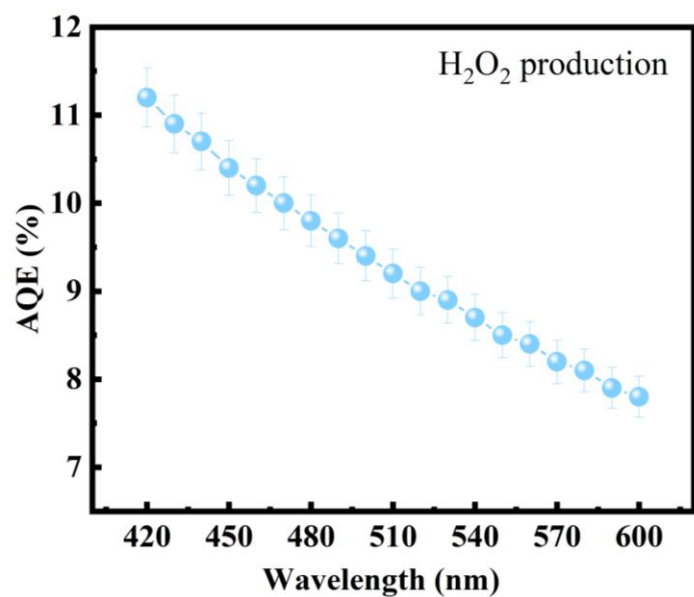

**Fig. S13.** H<sub>2</sub>O<sub>2</sub> production: Apparent quantum efficiency of CoIn<sub>2</sub>S<sub>4</sub>/MoSe<sub>2</sub> (Photocatalyst: 5 mg; Photolyte: 5 mL of (1:1) Na<sub>2</sub>S/Na<sub>2</sub>SO<sub>3</sub> solution; light source: 300 W Xenon light).

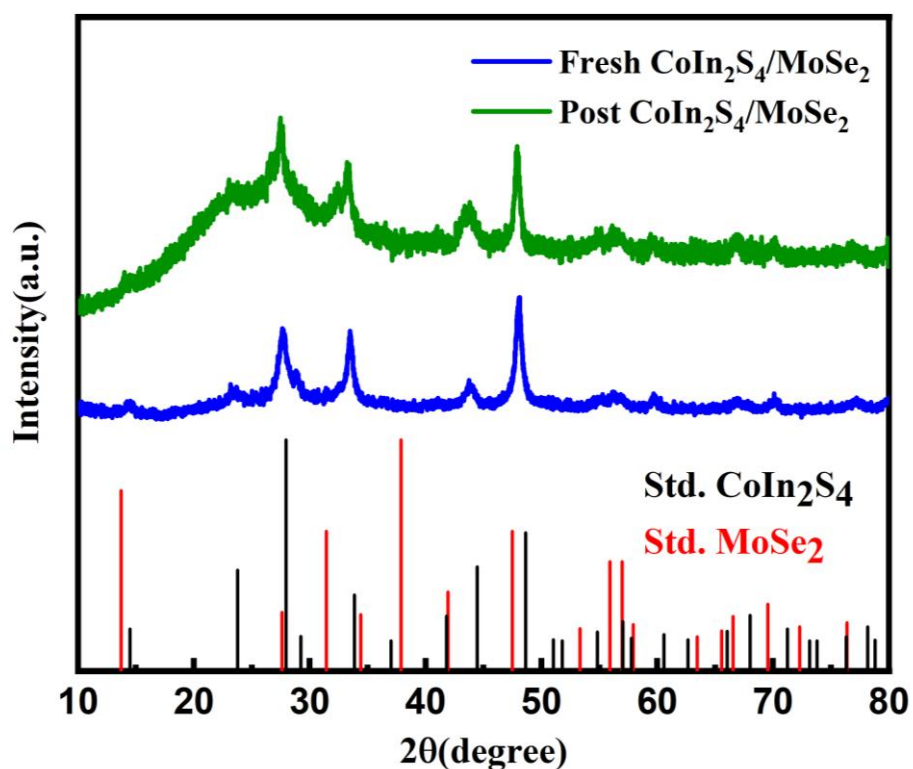

**Fig. S14** Comparison of XRD patterns before and after photocatalytic H<sub>2</sub> production cycles.

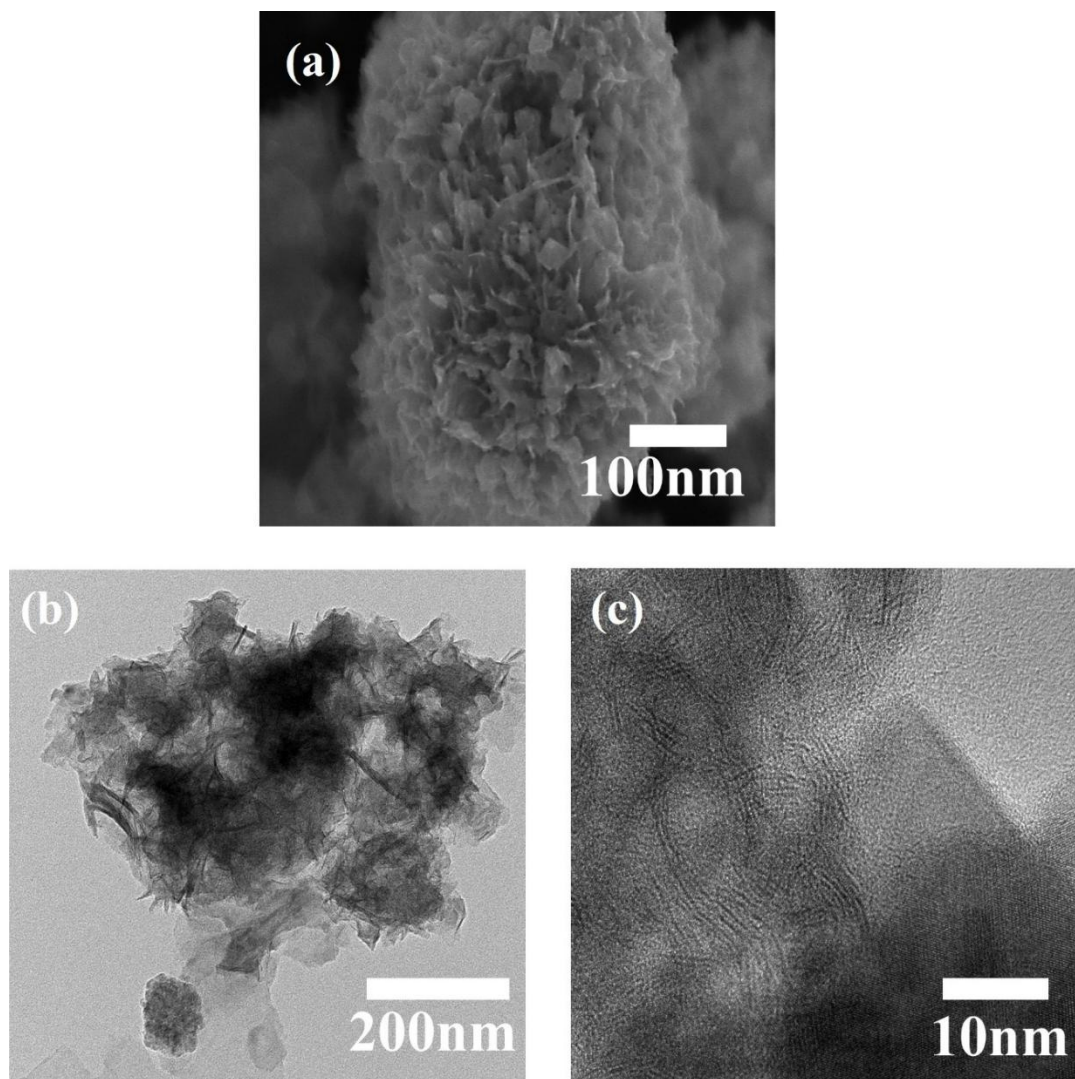

**Fig. S15.** (a) FESEM image and (b,c) TEM images of CoIn<sub>2</sub>S<sub>4</sub>/MoSe<sub>2</sub> after performing 15 h photocatalytic H<sub>2</sub> production reaction. (d) Comparison of XRD patterns before and after photocatalytic H<sub>2</sub> production cycles.

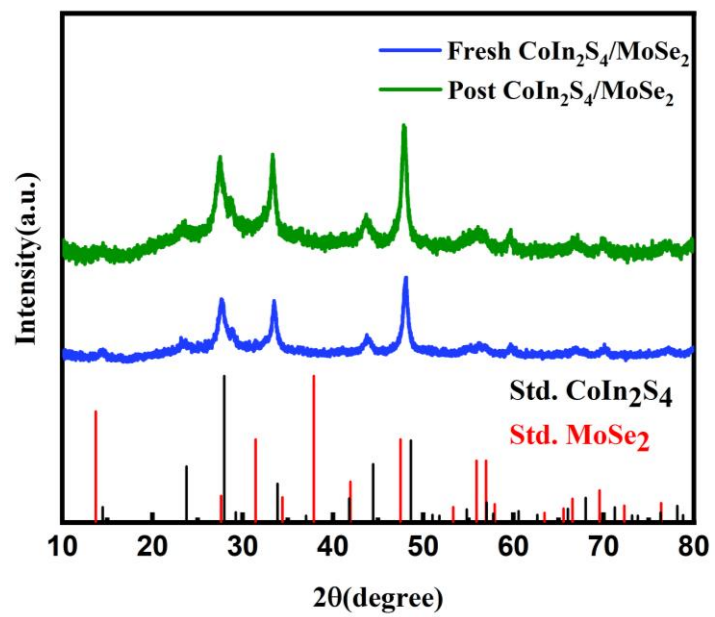

**Fig. S16.** Comparison of XRD patterns before and after photocatalytic H<sub>2</sub>O<sub>2</sub> production cycles.

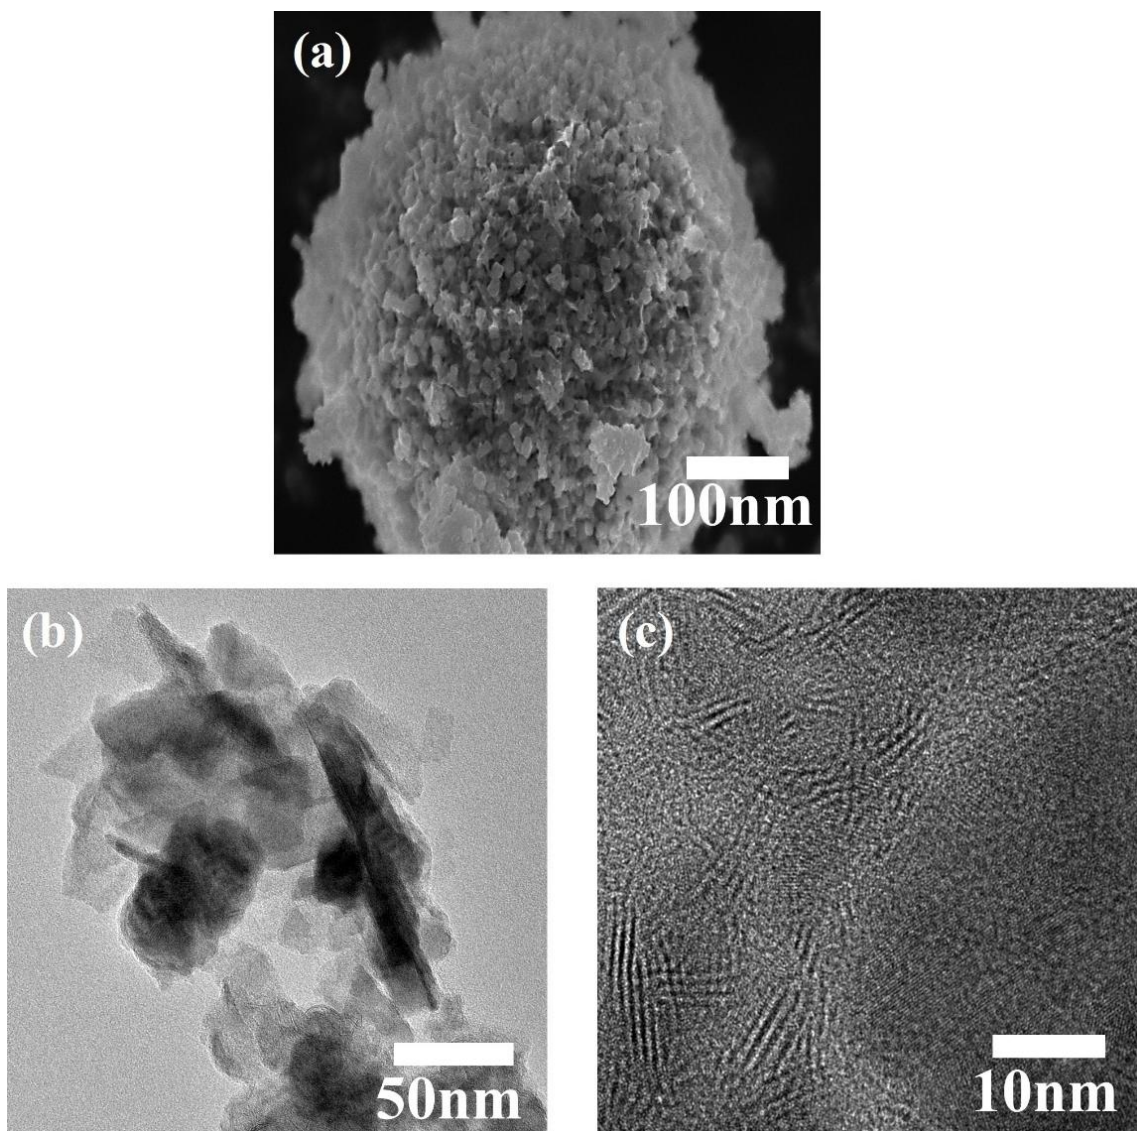

**Fig. S17.** (a) FESEM image, and (b,c) TEM images of  $\text{CoIn}_2\text{S}_4/\text{MoSe}_2$  after performing a 4 h photocatalytic  $\text{H}_2\text{O}_2$  production reaction.

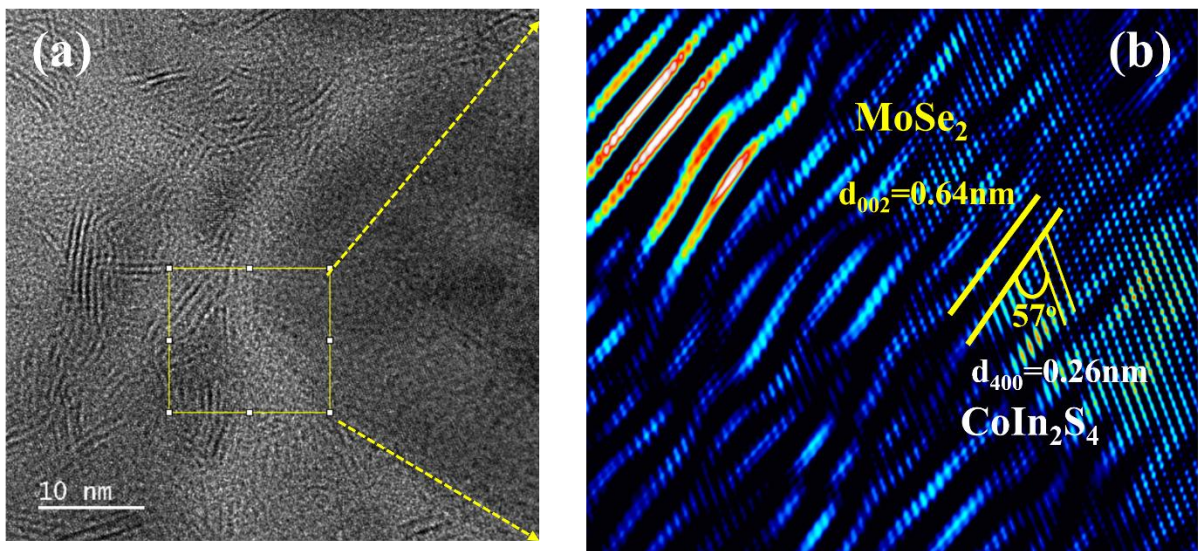

**Fig. S18.** (a) HRTEM image, and (b) Inverse FFT of HRTEM image of CoIn<sub>2</sub>S<sub>4</sub>/MoSe<sub>2</sub> after performing a photocatalytic reaction.

Here, the (400) plane of CoIn<sub>2</sub>S<sub>4</sub> and the (002) plane of MoSe<sub>2</sub> in CIS/MS are at an angle of 57°, with lattice spacing equal to 0.64 and 0.26nm, respectively.

$$\text{Therefore, } d_g = \frac{0.26}{\cos 57} = 0.47$$

$$\text{Finally, } f = \frac{0.64-0.47}{0.64} \times 100\% = 36.2\%$$

### **References:**

1. J. Zhang, X. Liang, C. Zhang, L. Lin, W. Xing, Z. Yu, G. Zhang and X. Wang, *Angew. Chem. Int. Ed.*, **2022**, 61, e202210849–e202210849.
2. X. Wang, T. Shi, X. Wang, A. Song, G. Li, L. Wang, J. Huang, A. Meng and Z. Li, *J. Energy Chem.*, **2024**, 92, 151–161.
3. Y. Ning, S. Wang, H. Wang, W. Quan, Daqi Lv, S. Yu, X. Hu and H. Tian, *J. Colloid Interface Sci.*, **2024**, 662, 928–940.
4. C. Cui, X. Zhao, X. Su, N. Xi, X. Wang, X. Yu, X. L. Zhang, H. Liu and Y. Sang, *Adv. Funct. Mater.*, **2022**, 32, 2208962.
5. C. Ding, C. Zhao, S. Cheng and X. Yang, *Surf. interfaces*, **202331**, 25, 101192–101192.

6. L. Gao, S. Chang, H. Gu, H. Zhang, Y. Huang, X. Wang, Q. Li and W. Dai, *ChemCatChem*, **2024**, e202400502.
7. L. Li, Z. Zhang, D. Fang and D. Yang, *Inorg. Chem. Commun.*, **2024**, 169, 112971.
8. C. Xing, Y. Liu, Y. Zhang, J. Liu, T. Zhang, P. Tang, J. Arbiol, L. Soler, K. Sivula, N. Guijarro, X. Wang, J. Li, R. Du, Y. Zuo, A. Cabot and J. Llorca, *J. Mater. Chem. A*, **2019**, 7, 17053–17059.
9. M.-Q. Yang, Y.-J. Xu, W. Lu, K. Zeng, H. Zhu, Q. Xu and Ghim Wei Ho, *Nat. Commun.*, **2017**, 8, 14224.
10. D. Xiang, X. Hao, X. Guo, G. Wang, K. Yang and Z. Jin, *Adv. Mater. Interfaces*, **2022**, 9, 2201400.
11. R. Wang, C. Ye, H. Wang and F. Jiang, *ACS omega*, **2020**, 5, 30373–30382.
12. L. Ma, C. Lin, W. Jiang, L. Xu, Y. Shao, T. Zhu, T. Zhao, X. Ai and X. Wu, *Int. J. Hydrog. Energy*, **2024**, 57, 290–300.
13. M. Zhu, Z. Sun, M. Fujitsuka and T. Majima, *Angew. Chem. Int. Ed.*, **2018**, 57, 2160–2164.
14. C. Zeng and Y. Hu, *Nanotechnol.*, **2020**, 31, 505711–505711.
15. W. Zhu, H. Zhu, T. Zhang, L. Qin, S. Kang and X. Li, *Small*, **2024**, 21, e2408806–e2408806.
16. G. Yang, H. Ding, D. Chen, J. Feng, Q. Hao and Y. Zhu, *Appl. Catal. B: Environ.*, **2018**, 234, 260–267.
17. Z. Jiang, B. Cheng, Y. Zhang, S. Wageh, A. A. Al-Ghamdi, J. Yu and L. Wang, *J. Mater. Sci. Technol.*, **2022**, 124, 193–201.
18. B. Liu, C. Bie, Y. Zhang, L. Wang, Y. Li and J. Yu, *Langmuir*, **2021**, 37, 14114–14124.
19. H. Liang, J. Zhao, Angeliki Brouzgou, A. Wang, S. Jing, P. Kannan, F. Chen and Panagiotis Tsiakaras, *J. Colloid Interface Sci.*, **2024**, 677, 1120–1133.
20. Z. Ren, Q. Ren, Y. Li, H. Li, X. Zhang, M. Wang and X. Liu, *J. Alloys Compd.*, **2025**, 1036, 182123.
21. M. Xu, J. Ye, Z. Fan, J. Li, Y. Dai, Y. Xie, Y. Chen, S. Li and J. Zhang, *Sep. Purif. Technol.*, **2025**, 376, 134163–134163.

\*\*\*\*\*
